# Supplementary material for: Human CRMP4 mutation and disrupted Crmp4 expression in mice are associated with ASD characteristics and sexual dimorphism
Source: PubMed Central journal article supplement (PMC5711804; doi:10.1038/s41598-017-16782-8), 2017-12-01
Supplement: 41598_2017_16782_MOESM1_ESM.pdf [file 41598_2017_16782_MOESM1_ESM.pdf]

**Human *CRMP4* mutation and disrupted *Crmp4* expression in mice are associated with ASD characteristics and sexual dimorphism**

Atsuhiko Tsutiya<sup>1,6</sup>, Yui Nakano<sup>2</sup>, Emily Hansen-Kiss<sup>3</sup>, Benjamin Kelly<sup>3</sup>, Masugi Nishihara<sup>4</sup>, Yoshio Goshima<sup>5</sup>, Don Corsmeier<sup>3</sup>, Peter White<sup>3</sup>, Gail E. Herman<sup>3</sup> and Ritsuko Ohtani-Kaneko<sup>1,2,7\*</sup>

<sup>1</sup>Institute of Life Innovation Studies, Toyo University, 1-1-1 Itakura, Oura, Gunma 374-0193, Japan.

<sup>2</sup>Graduate School of Life Sciences, Toyo University, 1-1-1 Itakura, Oura, Gunma 374-0193, Japan.

<sup>3</sup>The Institute for Genomic Medicine, Nationwide Children's Hospital and Department of Pediatrics, The Ohio State University, Columbus, OH 43205, USA.

<sup>4</sup>Department of Veterinary Physiology, Graduate School of Agricultural and Life Sciences, The University of Tokyo, 1-1-1 Yayoi, Bunkyo-ku, Tokyo 113-8657, Japan.

<sup>5</sup>Department of Molecular Pharmacology and Neurobiology, Yokohama City University Graduate School of Medicine, 3-9 Fuku-ura, Kanazawa Ward, Yokohama 236-0004, Japan.

<sup>6</sup>Clinical Proteomics and Molecular Medicine, St. Marianna University Graduate School of Medicine, Kawasaki, Japan.

<sup>7</sup>Research Center for Biomedical Engineering, Toyo University, 2100 Kujirai, Kawagoe, Saitama 350-8585, Japan.

## Supplementary Information

### *History of the ASD patient*

The patient weighed 3153 g at birth after a 39-week gestation and was born to a 28-year-old woman, gravida 2, para 1–2, with one previous miscarriage. This pregnancy was achieved by administration of Clomid and was complicated by maternal tobacco use, as well as weight loss of 12 lbs. Delivery was vaginal with vacuum assistance, and the baby was discharged home with his mother.

The family history is unremarkable. The patient has an older and a younger brother, both of whom are healthy with normal development, as are both parents. There is no known consanguinity. The patient had normal development until 3 years of age, during which there was a loss of language and social skills. He also developed unusual behaviours, including unusual obsessions and repetitive tapping of objects and making clicking noises. He attended a special needs preschool and repeated first grade. He has an individual education programme, receives speech therapy, and has been treated with Ritalin for attention-deficit/hyperactivity disorder.

At 8 years of age, the patient was assessed by an experienced psychologist using the Autism Diagnostic Observation Scale (ADOS) and received a score of 13 (Module 3), consistent with the diagnosis of ASD. The Autism Diagnostic Interview-Revised (ADI-R,) assessment, performed at 10 years of age, was also consistent with the ASD diagnosis. At 12 years of age, the patient received a full scale IQ standard score of 68 on the Stanford-Binet Intelligence Scale as part of CORA, falling into the ‘mildly impaired’ range (non-verbal IQ score, 82 and verbal IQ score, 57).

Previous genetic testing revealed a normal 46, XY male karyotype and normal results in DNA testing for Fragile X syndrome. As part of CORA, an oligonucleotide microarray was

performed (NimbleGen CGX-3) in 2011 that also showed no abnormalities. He underwent exome sequencing in the NCH Biomedical Genomics Core (BGC).

### ***Whole-exome sequencing***

Exome sequencing was performed on 72 simplex trios (affected and both parents). A total of 69 *de novo* damaging variants were confirmed, of which seven were considered pathogenic or likely pathogenic based on the predicted change in the protein and reports in the literature demonstrating that the gene is involved in human ASD and/or intellectual disability (G. Herman, personal communication).

DNA samples for exome sequencing were prepared from lymphoblastoid cell lines and were processed using the Agilent SureSelectXT Target Enrichment System for the Illumina Paired End Sequencing Protocol (Agilent Technologies, Santa Clara, CA, USA). DNA libraries prepared from the patient and both parents were captured using SureSelect Human All Exon v4 probes. Paired-end 100 base-pair reads were generated for exome-enriched libraries sequenced on the Illumina HiSeq 2000 (Illumina, San Diego, CA, USA) to an average depth of 74×. Secondary analysis was performed using Churchill, a pipeline at NCH, for the discovery of human genetic variation<sup>1</sup>. A *de novo* variant of *CRMP4* found in the sequenced sample from the proband but not in the parents or siblings was confirmed by Sanger sequencing using DNA prepared directly from a sample of whole blood to avoid any possible cell-line artefacts. PCR was performed for exon 11 using the primers 5'-CAGGTCATGTTCCCCTGTCT-3' and 5'-ACGCTGCCAAGATCTTCAAC-3' to amplify a 402-bp fragment.

***Crmp4 (pEGFP-Crmp4 vector) and Crmp4<sup>S540Y</sup> (pEGFP-Crmp4<sup>S540Y</sup>) expression vectors***

For the pEGFP-*Crmp4* vector, a cDNA fragment containing the full-length coding region of the mouse *Crmp4* gene was inserted into the *EcoRI* and *XhoI* sites of the pEGFP-N vector (Clontech Laboratories, Inc., Mountain View, CA, USA). *Crmp4*<sup>S540Y</sup> was made using the PrimSTAR mutagenesis kit (Takara Bio, Japan) according to the manufacturer's protocol using the WT *Crmp4* sequence as a template. The S540 in the mouse *Crmp4* is the homologous site of S541 in the human *CRMP4* sequence (NP\_001278384.1). The following primers were used to amplify the mutant mouse sequence: forward, 5'- CACCAGTATGTTGCCGAATACAACATC -3'; reverse, 5'- GGCAACATACTGGTGGTTCTTGGCAGA -3', where the underlined base results in the missense variant. Both constructs were sequenced on an ABI PRISM 310 Genetic Analyzer (Perkin Elmer Cetus), and both confirmed the WT and mutant sequences with no additional base changes.

### ***Real-time qRT-PCR***

WT and *Crmp4*-KO mice of both sexes at 8 weeks of age (n = 4 each) were deeply anesthetised with pentobarbital (50 mg/kg, i.p.), and their brains were removed from the skull. The OB, cortex, hippocampus and raphe were dissected out. RNA extraction, reverse transcription, and real-time qRT-PCR were performed as previously reported<sup>2</sup>. The primer pairs used are listed in Supplementary Table S3.

## Supplementary References

1. Kelly, B. J. *et al.* Churchill: an ultra-fast, deterministic, highly scalable and balanced parallelization strategy for the discovery of human genetic variation in clinical and population-scale genomics. *Genome Biol* **16**, 6 (2015).
2. Tsutiya A & Ohtani-Kaneko R. Postnatal alteration of collapsin response mediator protein 4 mRNA expression in the mouse brain. *J Anat.* **221**, 341–351 (2012).

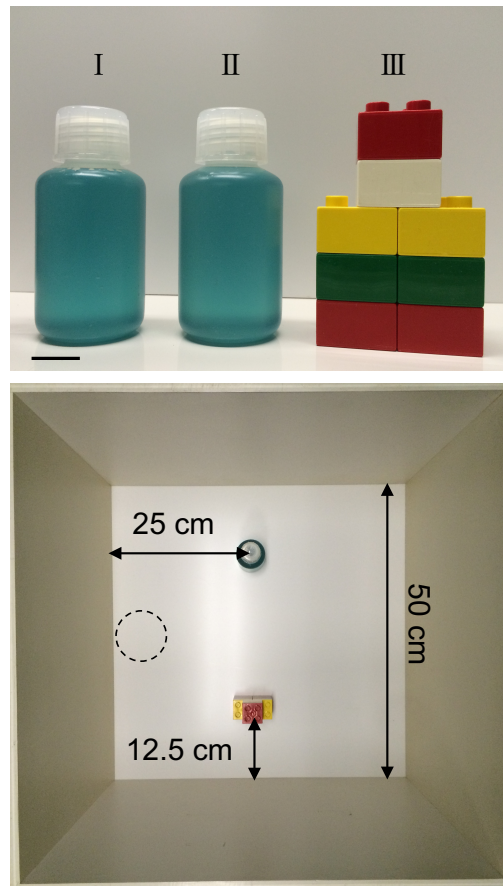

**Supplementary Fig. S1.** Novel object recognition test. During the familiarisation phase, two identical objects ('I' and 'II' in top panel) were located 12.5 cm away from the wall at the central width of the box (bottom panel). The mouse was then placed into the box, always facing the wall at the same position (dotted circle area in bottom panel) and allowed to freely explore for 10 min. Exploration of an object was defined as directing the nose to the object at a distance of less than 2 cm and/or touching it with the nose. After the test, the mouse was housed again. Object b was then replaced with a novel object ('III' in top panel), and the test phase was performed 60 min after the habituation phase. Each animal was placed at the same location (dotted circle area in bottom panel) and allowed to explore freely for 5 min. The total time spent exploring the two objects was measured during both the familiarisation and test phases. The preference index is the ratio of the amount of time spent exploring any one of the two objects (familiarisation phase) or the novel object (test phase) divided by the total time spent exploring both objects:  $[II/(I + II)] \times 100$  in the familiarisation phase and  $[III/(I + III)] \times 100$  in the test phase.

**Supplementary Table S1.**

Statistical values from ANOVA for behavioural analysis. Significant results are indicated in bold.

| Test                     | Statistical method            | <i>F</i> -statistics, degree of freedom, and <i>p</i> -values for ANOVA | <i>F</i> -statistics, degree of freedom, and <i>p</i> -values for ANOVA (for each effect and interaction) |                                                |                                          |                                    |                                                              |                                          |                                           |                                              |                                           |
|--------------------------|-------------------------------|-------------------------------------------------------------------------|-----------------------------------------------------------------------------------------------------------|------------------------------------------------|------------------------------------------|------------------------------------|--------------------------------------------------------------|------------------------------------------|-------------------------------------------|----------------------------------------------|-------------------------------------------|
|                          |                               |                                                                         | Genotype                                                                                                  |                                                | Sex                                      |                                    | Genotype × Sex                                               |                                          |                                           |                                              |                                           |
| Open field               | Distance                      |                                                                         | F(3,54) = 0.805, <i>p</i> = 0.497                                                                         | F(1,54) = 0.472, <i>p</i> = 0.495              |                                          | F(1,54) = 0.434, <i>p</i> = 0.513  |                                                              | F(1,54) = 1.269, <i>p</i> = 0.265        |                                           |                                              |                                           |
|                          | In zone center                | Two-way ANOVA                                                           | F(3,54) = 1.066, <i>p</i> = 0.371                                                                         | F(1,54) = 1.110, <i>p</i> = 0.297              |                                          | F(1,54) = 1.082, <i>p</i> = 0.303  |                                                              | F(1,54) = 1.027, <i>p</i> = 0.315        |                                           |                                              |                                           |
|                          | Velocity                      |                                                                         | F(3,54) = 0.788, <i>p</i> = 0.506                                                                         | F(1,54) = 0.479, <i>p</i> = 0.492              |                                          | F(1,54) = 0.393, <i>p</i> = 0.533  |                                                              | F(1,54) = 1.255, <i>p</i> = 0.268        |                                           |                                              |                                           |
| Elevated plus maze       | Time in open arms             |                                                                         | F(3,39) = 0.625, <i>p</i> = 0.603                                                                         | F(1,39) = 1.122, <i>p</i> = 0.296              |                                          | F(1,39) = 0.308, <i>p</i> = 0.582  |                                                              | F(1,39) = 0.529, <i>p</i> = 0.471        |                                           |                                              |                                           |
|                          | Time in closed arms           |                                                                         | F(3,39) = 0.204, <i>p</i> = 0.893                                                                         | F(1,39) = 0.159, <i>p</i> = 0.692              |                                          | F(1,39) = 0.444, <i>p</i> = 0.509  |                                                              | F(1,39) = 0.043, <i>p</i> = 0.837        |                                           |                                              |                                           |
|                          | No. of entries to open arms   | Two-way ANOVA                                                           | F(3,39) = 0.208, <i>p</i> = 0.891                                                                         | F(1,39) = 0.013, <i>p</i> = 0.909              |                                          | F(1,39) = 0.001, <i>p</i> = 0.979  |                                                              | F(1,39) = 0.606, <i>p</i> = 0.441        |                                           |                                              |                                           |
|                          | No. of entries to closed arms |                                                                         | F(3,39) = 1.736, <i>p</i> = 0.175                                                                         | F(1,39) = 1.787, <i>p</i> = 0.190              |                                          | F(1,39) = 3.967, <i>p</i> = 0.053  |                                                              | F(1,39) = 0.012, <i>p</i> = 0.912        |                                           |                                              |                                           |
| Novel object recognition | Familiarisation               | Preference                                                              | F(3,52) = 0.697, <i>p</i> = 0.558                                                                         | F(1,52) = 0.801, <i>p</i> = 0.372              |                                          | F(1,52) = 0.616, <i>p</i> = 0.436  |                                                              | F(1,52) = 0.762, <i>p</i> = 0.387        |                                           |                                              |                                           |
|                          |                               | Total time                                                              | F(3,52) = 0.065, <i>p</i> = 0.978                                                                         | F(1,52) = 0.028, <i>p</i> = 0.868              |                                          | F(1,52) = 0.038, <i>p</i> = 0.847  |                                                              | F(1,52) = 0.140, <i>p</i> = 0.709        |                                           |                                              |                                           |
|                          | Test                          | Preference                                                              | F(3,52) = 0.075, <i>p</i> = 0.973                                                                         | F(1,52) = 0.014, <i>p</i> = 0.906              |                                          | F(1,52) = 0.077, <i>p</i> = 0.782  |                                                              | F(1,52) = 0.143, <i>p</i> = 0.707        |                                           |                                              |                                           |
|                          |                               | Total time                                                              | F(3,52) = 0.877, <i>p</i> = 0.459                                                                         | F(1,52) = 1.172, <i>p</i> = 0.284              |                                          | F(1,52) = 0.943, <i>p</i> = 0.336  |                                                              | F(1,52) = 0.224, <i>p</i> = 0.638        |                                           |                                              |                                           |
| Three-chamber test       | 6W                            | Three-way ANOVA                                                         | Duration (s)                                                                                              | <b>F(11,120) = 15.829, <i>p</i> &lt; 0.001</b> | F(1,120) = 0.000, <i>p</i> = 1.000       | F(1,120) = 0.000, <i>p</i> = 1.000 | <b>F(2,120) = 81.648, <i>p</i> &lt; 0.001</b>                | F(1,120) = 0.000, <i>p</i> = 1.000       | F(2,120) = 1.484, <i>p</i> = 0.231        | F(2,120) = 0.902, <i>p</i> = 0.409           | F(2,120) = 2.078, <i>p</i> = 0.130        |
|                          |                               |                                                                         | No. of entries                                                                                            | F(7,80) = 0.334, <i>p</i> = 0.936              | F(1,80) = 1.083, <i>p</i> = 0.301        | F(1,80) = 0.523, <i>p</i> = 0.472  | F(1,80) = 0.002, <i>p</i> = 0.961                            | F(1,80) = 0.452, <i>p</i> = 0.503        | F(1,80) = 0.260, <i>p</i> = 0.611         | F(1,80) = 0.102, <i>p</i> = 0.750            | F(1,80) = 0.011, <i>p</i> = 0.917         |
|                          | 10W                           | Three-way ANOVA                                                         | Sniffing (s)                                                                                              | <b>F(7,80) = 4.410, <i>p</i> &lt; 0.001</b>    | F(1,80) = 0.166, <i>p</i> = 0.685        | F(1,80) = 0.043, <i>p</i> = 0.835  | <b>F(1,80) = 19.626, <i>p</i> &lt; 0.001</b>                 | F(1,80) = 0.195, <i>p</i> = 0.660        | F(1,80) = 4.988, <i>p</i> = <b>0.028</b>  | <b>F(1,80) = 5.299, <i>p</i> = 0.024</b>     | F(1,80) = 1.127, <i>p</i> = 0.292         |
|                          |                               |                                                                         | Duration (s)                                                                                              | <b>F(11,102) = 21.618, <i>p</i> &lt; 0.001</b> | F(1,102) = 0.000, <i>p</i> = 1.000       | F(1,102) = 0.000, <i>p</i> = 1.000 | <b>F(2,102) = 101.6, <i>p</i> &lt; 0.001</b>                 | F(1,102) = 0.000, <i>p</i> = 1.000       | <b>F(2,102) = 5.904, <i>p</i> = 0.004</b> | <b>F(2,102) = 9.791, <i>p</i> &lt; 0.001</b> | F(2,102) = 0.532, <i>p</i> = 0.589        |
|                          |                               | Three-way ANOVA                                                         | No. of entries                                                                                            | F(7,68) = 0.609, <i>p</i> = 0.746              | F(1,68) = 1.049, <i>p</i> = 0.309        | F(1,68) = 1.152, <i>p</i> = 0.287  | F(1,68) = 0.370, <i>p</i> = 0.545                            | F(1,68) = 0.039, <i>p</i> = 0.844        | F(1,68) = 0.130, <i>p</i> = 0.719         | F(1,68) = 0.064, <i>p</i> = 0.801            | F(1,68) = 1.058, <i>p</i> = 0.307         |
|                          |                               |                                                                         | Sniffing (s)                                                                                              | <b>F(7,68) = 9.675, <i>p</i> &lt; 0.001</b>    | <b>F(1,68) = 4.128, <i>p</i> = 0.046</b> | F(1,68) = 3.453, <i>p</i> = 0.067  | <b>F(1,68) = 26.493, <i>p</i> &lt; 0.001</b>                 | F(1,68) = 0.130, <i>p</i> = 0.720        | <b>F(1,68) = 13.125, <i>p</i> = 0.001</b> | <b>F(1,68) = 14.596, <i>p</i> &lt; 0.001</b> | <b>F(1,68) = 4.869, <i>p</i> = 0.031</b>  |
| Social interaction       | Two-way ANOVA                 | F(3,57) = 6.207, <i>p</i> = 0.01                                        | <b>F(1,57) = 14.966, <i>p</i> &lt; 0.001</b>                                                              |                                                | F(1,57) = 1.120, <i>p</i> = 0.294        |                                    | F(1,57) = 1.891, <i>p</i> = 0.174                            |                                          |                                           |                                              |                                           |
| Tube test                | Binomial test                 |                                                                         | Male WT vs. KO<br><i>p</i> = 1.000 (Win, WT : KO = 6 : 6)                                                 |                                                |                                          |                                    | Female WT vs. KO<br><i>p</i> = 0.815 (Win, WT : KO = 8 : 10) |                                          |                                           |                                              |                                           |
| Food exploring           | Two-way ANOVA                 | 7W                                                                      | F(3,54) = 1.785, <i>p</i> = 0.161                                                                         | F(1,54) = 1.874, <i>p</i> = 0.177              |                                          | F(1,54) = 3.416, <i>p</i> = 0.070  |                                                              | F(1,54) = 0.207, <i>p</i> = 0.551        |                                           |                                              |                                           |
|                          |                               | 11W                                                                     | F(3,47) = 0.961, <i>p</i> = 0.419                                                                         | F(1,47) = 0.154, <i>p</i> = 0.697              |                                          | F(1,47) = 0.505, <i>p</i> = 0.481  |                                                              | F(1,47) = 2.493, <i>p</i> = 0.121        |                                           |                                              |                                           |
| Hot plate                | Two-way ANOVA                 | F(3,83) = 0.869, <i>p</i> = 0.461                                       | F(1,83) = 2.119, <i>p</i> = 0.149                                                                         |                                                | F(1,83) = 0.240, <i>p</i> = 0.625        |                                    | F(1,83) = 0.186, <i>p</i> = 0.668                            |                                          |                                           |                                              |                                           |
| UV experiment            | Three-way ANOVA               | Bedding                                                                 | Genotype                                                                                                  | <b>F(7,98) = 3.336, <i>p</i> = 0.003</b>       | <b>F(1,98) = 5.357, <i>p</i> = 0.023</b> |                                    | <b>F(1,98) = 10.577, <i>p</i> = 0.002</b>                    | <b>F(1,98) = 4.129, <i>p</i> = 0.045</b> | <b>F(1,98) = 5.313, <i>p</i> = 0.023</b>  | F(1,98) = 0.000, <i>p</i> = 0.991            | F(1,98) = 0.037, <i>p</i> = 0.848         |
|                          |                               |                                                                         | Sex                                                                                                       | F(1,98) = 0.001, <i>p</i> = 0.976              | F(1,98) = 0.001, <i>p</i> = 0.976        |                                    | F(1,98) = 0.001, <i>p</i> = 0.976                            |                                          | F(1,98) = 0.001, <i>p</i> = 0.976         |                                              | F(1,98) = 0.001, <i>p</i> = 0.976         |
| Temperature              | Three-way ANOVA               | Temperature                                                             | Genotype                                                                                                  | <b>F(11,128) = 3.931, <i>p</i> &lt; 0.001</b>  | F(1,128) = 0.279, <i>p</i> = 0.599       |                                    | <b>F(2,128) = 8.288, <i>p</i> &lt; 0.001</b>                 | F(1,128) = 0.426, <i>p</i> = 0.515       | <b>F(2,128) = 7.243, <i>p</i> = 0.001</b> | F(2,128) = 1.689, <i>p</i> = 0.189           | <b>F(2,128) = 4.827, <i>p</i> = 0.010</b> |
|                          |                               |                                                                         | Sex                                                                                                       | F(1,128) = 0.367, <i>p</i> = 0.546             | F(1,128) = 0.367, <i>p</i> = 0.546       |                                    | F(1,128) = 0.367, <i>p</i> = 0.546                           |                                          | F(1,128) = 0.367, <i>p</i> = 0.546        |                                              | F(1,128) = 0.367, <i>p</i> = 0.546        |

**Supplementary Table S2.**

Statistical *p*-values from multiple comparisons (PLSD, Bonferroni, Sidak, and Tukey HSD) for behavioural studies. Significant results are indicated in bold.

| Test                     | Subject             | Comparison       | <i>p</i> -values from multiple comparison |                  |                  |                  |                  |
|--------------------------|---------------------|------------------|-------------------------------------------|------------------|------------------|------------------|------------------|
|                          |                     |                  | PLSD                                      | Bonferroni       | Sidak            | Tukey HSD        |                  |
| Three chamber test (6W)  | Duration            | Male KO          | Stranger vs. Object                       | <b>0.001</b>     | <b>0.034</b>     | <b>0.033</b>     | <b>0.025</b>     |
|                          |                     | Male WT          | Stranger vs. Object                       | <b>0.008</b>     | 0.226            | 0.203            | 0.133            |
|                          | Sniffing            | Male KO          | Stranger vs. Object                       | 0.560            | 1.000            | 1.000            | 0.999            |
|                          |                     | Female WT        | Stranger vs. Object                       | <b>&lt;0.001</b> | <b>0.009</b>     | <b>0.009</b>     | <b>0.007</b>     |
|                          |                     | Female KO        | Stranger vs. Object                       | <b>0.005</b>     | 0.131            | 0.123            | 0.084            |
| Three chamber test (10W) | Duration            | Male KO          | Stranger vs. Object                       | <b>0.009</b>     | 0.577            | 0.440            | 0.255            |
|                          |                     | Female WT        | Stranger vs. Object                       | <b>&lt;0.001</b> | <b>0.009</b>     | <b>0.009</b>     | <b>0.007</b>     |
|                          | Sniffing            | Male WT          | Stranger vs. Object                       | <b>&lt;0.001</b> | <b>0.012</b>     | <b>0.012</b>     | <b>0.010</b>     |
|                          |                     | Male KO          | Stranger vs. Object                       | <b>0.041</b>     | 1.000            | 0.692            | 0.438            |
|                          |                     | Female WT        | Stranger vs. Object                       | <b>&lt;0.001</b> | <b>&lt;0.001</b> | <b>&lt;0.001</b> | <b>&lt;0.001</b> |
| Female KO                | Stranger vs. Object | <b>&lt;0.001</b> | <b>0.003</b>                              | <b>0.003</b>     | <b>0.003</b>     |                  |                  |
| Social interaction test  | Male                | WT vs. KO        | <b>&lt;0.001</b>                          | <b>0.002</b>     | <b>0.002</b>     | <b>0.002</b>     |                  |
|                          | Female              | WT vs. KO        | 0.093                                     | 0.556            | 0.442            | 0.328            |                  |
| UV experiment            | Bedding             | Male WT          | Familiar vs. Unfamiliar                   | <b>0.015</b>     | 0.433            | 0.354            | 0.223            |
|                          |                     | Male KO          | Familiar vs. Unfamiliar                   | 0.560            | 1.000            | 1.000            | 0.999            |
|                          |                     | Female WT        | Familiar vs. Unfamiliar                   | <b>0.007</b>     | 0.188            | 0.172            | 0.115            |
|                          |                     | Female KO        | Familiar vs. Unfamiliar                   | 0.671            | 1.000            | 1.000            | 1.000            |
|                          |                     | Male Unfamiliar  | WT vs. KO                                 | <b>0.002</b>     | 0.061            | 0.059            | <b>0.044</b>     |
|                          | Temperature         | Male WT          | 19°C vs. 9°C                              | <b>&lt;0.001</b> | <b>&lt;0.001</b> | <b>&lt;0.001</b> | <b>&lt;0.001</b> |
| Male KO                  |                     | 19°C vs. 9°C     | <b>0.037</b>                              | 1.000            | 0.916            | 0.617            |                  |
| Female WT                |                     | 19°C vs. 9°C     | <b>0.004</b>                              | 0.240            | 0.213            | 0.132            |                  |
| Female KO                |                     | 19°C vs. 9°C     | <b>0.026</b>                              | 1.000            | 0.822            | 0.513            |                  |
| Male 9°C                 |                     | WT vs. KO        | <b>0.001</b>                              | 0.078            | 0.075            | 0.051            |                  |
| KO 9°C                   |                     | Male vs. Female  | <b>0.011</b>                              | 0.745            | 0.527            | 0.308            |                  |



**Supplementary Table S3.**

Statistical *p*-values from multiple comparison (PLSD, Bonferroni, Sidak, and Tukey HSD) for gene expression analysis. Significant results are indicated in bold.

| Brain region      | Gene             | Comparison         | <i>p</i> -values from multiple comparison |                  |                  |                  |       |
|-------------------|------------------|--------------------|-------------------------------------------|------------------|------------------|------------------|-------|
|                   |                  |                    | PSLD                                      | Bonferroni       | Sidak            | Tukey HSD        |       |
| OB                | <i>GluR2</i>     | Female WT vs. KO   | <b>0.019</b>                              | 0.115            | 0.110            | 0.079            |       |
|                   |                  | Male WT vs. KO     | <b>0.010</b>                              | 0.057            | 0.056            | <b>0.041</b>     |       |
|                   | <i>VGluT1</i>    | Female WT vs. KO   | <b>&lt;0.001</b>                          | <b>0.001</b>     | <b>0.001</b>     | <b>0.001</b>     |       |
|                   |                  | WT male vs. female | <b>0.003</b>                              | <b>0.021</b>     | <b>0.020</b>     | <b>0.016</b>     |       |
|                   | <i>VGluT2</i>    | KO male vs. female | <b>0.014</b>                              | 0.087            | 0.083            | 0.061            |       |
|                   | <i>GABAAα1</i>   | Female WT vs. KO   | <b>&lt;0.001</b>                          | <b>&lt;0.001</b> | <b>&lt;0.001</b> | <b>&lt;0.001</b> |       |
|                   |                  | KO male vs. female | <b>&lt;0.001</b>                          | <b>&lt;0.001</b> | <b>&lt;0.001</b> | <b>&lt;0.001</b> |       |
|                   | <i>GABAAγ2</i>   | Female WT vs. KO   | <b>&lt;0.001</b>                          | <b>0.001</b>     | <b>0.001</b>     | <b>0.001</b>     |       |
|                   |                  | KO male vs. female | <b>0.006</b>                              | <b>0.039</b>     | <b>0.038</b>     | <b>0.029</b>     |       |
|                   | <i>GABABR1</i>   | Female WT vs. KO   | <b>0.002</b>                              | <b>0.012</b>     | <b>0.012</b>     | <b>0.009</b>     |       |
|                   |                  | KO male vs. female | <b>0.029</b>                              | 0.174            | 0.162            | 0.114            |       |
|                   | <i>VGAT</i>      | Female WT vs. KO   | <b>&lt;0.001</b>                          | <b>0.003</b>     | <b>0.003</b>     | <b>0.002</b>     |       |
|                   |                  | KO male vs. female | <b>0.012</b>                              | 0.073            | 0.071            | 0.052            |       |
|                   | <i>Ncam1</i>     | Male WT vs. KO     | <b>0.009</b>                              | 0.053            | 0.051            | <b>0.038</b>     |       |
|                   |                  | Female WT vs. KO   | <b>0.007</b>                              | <b>0.039</b>     | <b>0.039</b>     | <b>0.029</b>     |       |
|                   | Hippocampus      | <i>GluR1</i>       | Male WT vs. KO                            | <b>0.014</b>     | 0.082            | 0.079            | 0.057 |
|                   |                  |                    | KO male vs. female                        | <b>0.015</b>     | 0.088            | 0.085            | 0.062 |
|                   |                  | <i>GluR2</i>       | Male WT vs. KO                            | <b>0.015</b>     | 0.092            | 0.089            | 0.063 |
| <i>GABAAα1</i>    |                  | KO male vs. female | <b>0.031</b>                              | 0.186            | 0.172            | 0.121            |       |
| <i>GABABR1</i>    |                  | KO male vs. female | <b>0.034</b>                              | 0.204            | 0.187            | 0.132            |       |
| Cortex            | <i>GABAAγ2</i>   | Female WT vs. KO   | <b>0.003</b>                              | <b>0.016</b>     | <b>0.016</b>     | <b>0.012</b>     |       |
|                   |                  | WT male vs. Female | <b>0.012</b>                              | 0.072            | 0.070            | 0.051            |       |
|                   | <i>GABABR1</i>   | Male WT vs. KO     | <b>0.014</b>                              | 0.083            | 0.080            | 0.058            |       |
|                   |                  | Male WT vs. KO     | <b>0.003</b>                              | <b>0.020</b>     | <b>0.019</b>     | <b>0.015</b>     |       |
|                   | <i>Ncam1</i>     | Female WT vs. KO   | <b>0.002</b>                              | <b>0.010</b>     | <b>0.010</b>     | <b>0.008</b>     |       |
|                   |                  | Male WT vs. KO     | <b>0.002</b>                              | <b>0.012</b>     | <b>0.012</b>     | <b>0.009</b>     |       |
| <i>N-cadherin</i> | Male WT vs. KO   | <b>0.002</b>       | <b>0.012</b>                              | <b>0.012</b>     | <b>0.009</b>     |                  |       |
|                   | Female WT vs. KO | <b>&lt;0.001</b>   | <b>&lt;0.001</b>                          | <b>&lt;0.001</b> | <b>&lt;0.001</b> |                  |       |

**Supplementary Table S4. Gene expressions without significant differences among groups in adults**

| Brain region   | Genes                   | F-statistics, degree of freedom, and p-values for two-way ANOVA |                               |                               |                               | Expression levels                                 |                                  |               |                  |               |                  |
|----------------|-------------------------|-----------------------------------------------------------------|-------------------------------|-------------------------------|-------------------------------|---------------------------------------------------|----------------------------------|---------------|------------------|---------------|------------------|
|                |                         | For each factor and interaction                                 |                               |                               |                               | Fold differences                                  |                                  | Male          |                  | Female        |                  |
|                |                         | Genotype                                                        | Sex                           | Genotype × Sex                |                               | WT vs. <i>Crmp4</i> -KO<br>( <i>Crmp4</i> -KO/WT) | Male vs. Female<br>(Female/Male) | WT            | <i>Crmp4</i> -KO | WT            | <i>Crmp4</i> -KO |
| Olfactory bulb | <i>Crmp4</i>            | Not performed                                                   |                               |                               |                               | Not performed                                     | 1.102                            | 2.578 ± 0.145 | ND               | 2.958 ± 0.099 | ND               |
|                | <i>GluR1</i>            | F(3,12) = 0.131,<br>p = 0.940                                   | F(1,12) = 0.218,<br>p = 0.649 | F(1,12) = 0.173,<br>p = 0.685 | F(1,12) = 0.001,<br>p = 0.976 | 1.102                                             | 1.090                            | 0.861 ± 0.255 | 0.959 ± 0.040    | 0.949 ± 0.211 | 1.034 ± 0.205    |
|                | <i>DIR</i>              | F(3,8) = 1.166,<br>p = 0.381                                    | F(1,8) = 3.097,<br>p = 0.116  | F(1,8) = 0.003,<br>p = 0.961  | F(1,8) = 0.398,<br>p = 0.546  | 1.895                                             | 1.018                            | 0.263 ± 0.118 | 0.395 ± 0.178    | 0.195 ± 0.068 | 0.474 ± 0.064    |
|                | <i>D2R</i>              | F(3,8) = 0.871,<br>p = 0.495                                    | F(1,8) = 0.236,<br>p = 0.640  | F(1,8) = 2.369,<br>p = 0.162  | F(1,8) = 0.007,<br>p = 0.938  | 1.144                                             | 1.542                            | 0.300 ± 0.084 | 0.346 ± 0.018    | 0.466 ± 0.206 | 0.531 ± 0.049    |
|                | <i>5HT<sub>1A</sub></i> | F(3,12) = 0.625,<br>p = 0.612                                   | F(1,12) = 0.847,<br>p = 0.375 | F(1,12) = 0.684,<br>p = 0.424 | F(1,12) = 0.344,<br>p = 0.569 | 1.277                                             | 0.804                            | 0.550 ± 0.143 | 0.789 ± 0.236    | 0.511 ± 0.100 | 0.564 ± 0.123    |
|                | <i>5HT<sub>2A</sub></i> | F(3,12) = 1.418,<br>p = 0.286                                   | F(1,12) = 0.017,<br>p = 0.898 | F(1,12) = 2.742,<br>p = 0.124 | F(1,12) = 1.494,<br>p = 0.245 | 0.938                                             | 2.374                            | 0.110 ± 0.067 | 0.295 ± 0.115    | 0.596 ± 0.302 | 0.368 ± 0.070    |
|                | <i>5HT<sub>7</sub></i>  | F(3,8) = 0.143,<br>p = 0.474                                    | F(1,8) = 1.617,<br>p = 0.239  | F(1,8) = 4.821,<br>p = 0.059  | F(1,8) = 0.772,<br>p = 0.405  | 1.425                                             | 1.869                            | 0.612 ± 0.111 | 0.716 ± 0.017    | 0.959 ± 0.102 | 1.524 ± 0.503    |
|                | <i>GABAAβ2</i>          | F(3,12) = 1.629,<br>p = 0.235                                   | F(1,12) = 2.730,<br>p = 0.124 | F(1,12) = 0.215,<br>p = 0.651 | F(1,12) = 1.942,<br>p = 0.189 | 1.216                                             | 1.056                            | 2.784 ± 0.302 | 2.872 ± 0.317    | 2.464 ± 0.481 | 3.509 ± 0.218    |
| Hippocampus    | <i>Crmp4</i>            | Not performed                                                   |                               |                               |                               | Not performed                                     | 0.879                            | 0.700 ± 0.060 | ND               | 0.615 ± 0.042 | ND               |
|                | <i>VGluT2</i>           | F(3,12) = 0.666,<br>p = 0.589                                   | F(1,12) = 0.936,<br>p = 0.352 | F(1,12) = 0.901,<br>p = 0.361 | F(1,12) = 0.161,<br>p = 0.695 | 0.847                                             | 1.175                            | 0.779 ± 0.056 | 0.700 ± 0.077    | 0.963 ± 0.196 | 0.775 ± 0.164    |
|                | <i>D1R</i>              | F(3,9) = 3.546,<br>p = 0.061                                    | F(1,9) = 3.611,<br>p = 0.090  | F(1,9) = 3.156,<br>p = 0.109  | F(1,9) = 4.288,<br>p = 0.068  | 1.290                                             | 0.789                            | 0.674 ± 0.118 | 0.660 ± 0.044    | 0.368 ± 0.016 | 0.683 ± 0.014    |
|                | <i>D2R</i>              | F(3,8) = 0.215,<br>p = 0.883                                    | F(1,8) = 0.216,<br>p = 0.655  | F(1,8) = 0.176,<br>p = 0.686  | F(1,8) = 0.253,<br>p = 0.629  | 1.169                                             | 1.153                            | 0.132 ± 0.053 | 0.130 ± 0.009    | 0.128 ± 0.016 | 0.174 ± 0.079    |
|                | <i>5HT<sub>1A</sub></i> | F(3,12) = 1.365,<br>p = 0.301                                   | F(1,12) = 2.665,<br>p = 0.129 | F(1,12) = 1.424,<br>p = 0.256 | F(1,12) = 0.005,<br>p = 0.943 | 1.303                                             | 1.213                            | 0.836 ± 0.303 | 1.326 ± 0.228    | 1.241 ± 0.170 | 1.602 ± 0.170    |
|                | <i>5HT<sub>2A</sub></i> | F(3,11) = 1.657,<br>p = 0.233                                   | F(1,11) = 0.059,<br>p = 0.813 | F(1,11) = 4.094,<br>p = 0.068 | F(1,11) = 0.512,<br>p = 0.489 | 1.117                                             | 0.377                            | 0.136 ± 0.062 | 0.183 ± 0.067    | 0.071 ± 0.038 | 0.048 ± 0.019    |
|                | <i>5HT<sub>7</sub></i>  | F(3,8) = 1.211,<br>p = 0.366                                    | F(1,8) = 0.781,<br>p = 0.403  | F(1,8) = 1.004,<br>p = 0.346  | F(1,8) = 1.849,<br>p = 0.211  | 1.373                                             | 1.435                            | 0.297 ± 0.057 | 0.241 ± 0.085    | 0.255 ± 0.061 | 0.517 ± 0.200    |
|                | <i>GABAAβ2</i>          | F(3,12) = 0.416,<br>p = 0.745                                   | F(1,12) = 0.216,<br>p = 0.650 | F(1,12) = 0.992,<br>p = 0.339 | F(1,12) = 0.040,<br>p = 0.845 | 0.916                                             | 1.223                            | 0.281 ± 0.012 | 0.244 ± 0.044    | 0.328 ± 0.095 | 0.314 ± 0.045    |
|                | <i>GABAAγ2</i>          | F(3,12) = 0.396,<br>p = 0.758                                   | F(1,12) = 0.475,<br>p = 0.504 | F(1,12) = 0.357,<br>p = 0.561 | F(1,12) = 0.357,<br>p = 0.561 | 1.096                                             | 0.917                            | 0.193 ± 0.012 | 0.229 ± 0.042    | 0.193 ± 0.026 | 0.194 ± 0.020    |
|                | <i>VGAT</i>             | F(3,12) = 0.503,<br>p = 0.688                                   | F(1,12) = 0.197,<br>p = 0.665 | F(1,12) = 0.911,<br>p = 0.359 | F(1,12) = 0.401,<br>p = 0.539 | 1.047                                             | 0.906                            | 0.302 ± 0.017 | 0.296 ± 0.053    | 0.255 ± 0.016 | 0.287 ± 0.014    |
|                | <i>Ncam1</i>            | F(3,12) = 1.535,<br>p = 0.256                                   | F(1,12) = 2.512,<br>p = 0.139 | F(1,12) = 2.077,<br>p = 0.175 | F(1,12) = 0.014,<br>p = 0.906 | 1.084                                             | 1.076                            | 0.082 ± 0.041 | 0.141 ± 0.071    | 1.035 ± 0.159 | 1.318 ± 0.223    |
| Cortex         | <i>Crmp4</i>            | Not performed                                                   |                               |                               |                               | Not performed                                     | 1.182                            | 0.615 ± 0.059 | ND               | 0.727 ± 0.058 | ND               |
|                | <i>GluR1</i>            | F(3,8) = 2.287,<br>p = 0.155                                    | F(1,8) = 0.547,<br>p = 0.481  | F(1,8) = 4.394,<br>p = 0.069  | F(1,8) = 1.921,<br>p = 0.203  | 0.854                                             | 1.574                            | 0.294 ± 0.031 | 0.162 ± 0.023    | 0.339 ± 0.056 | 0.379 ± 0.104    |
|                | <i>GluR2</i>            | F(3,10) = 1.874,<br>p = 0.198                                   | F(1,10) = 0.004,<br>p = 0.948 | F(1,10) = 1.455,<br>p = 0.255 | F(1,10) = 3.410,<br>p = 0.095 | 1.006                                             | 0.860                            | 0.392 ± 0.059 | 0.319 ± 0.019    | 0.267 ± 0.015 | 0.345 ± 0.035    |
|                | <i>VGluT1</i>           | F(3,12) = 1.719,<br>p = 0.216                                   | F(1,12) = 1.631,<br>p = 0.226 | F(1,12) = 2.892,<br>p = 0.115 | F(1,12) = 0.663,<br>p = 0.442 | 1.004                                             | 1.011                            | 1.085 ± 0.008 | 1.084 ± 0.004    | 1.091 ± 0.009 | 1.101 ± 0.004    |
|                | <i>D1R</i>              | F(3,8) = 0.403,<br>p = 0.755                                    | F(1,8) = 0.000,<br>p = 0.985  | F(1,8) = 0.048,<br>p = 0.833  | F(1,8) = 1.163,<br>p = 0.312  | 1.005                                             | 0.943                            | 1.932 ± 0.451 | 1.467 ± 0.476    | 1.362 ± 0.151 | 1.845 ± 0.567    |
|                | <i>D2R</i>              | F(3,8) = 1.369,<br>p = 0.320                                    | F(1,8) = 0.396,<br>p = 0.547  | F(1,8) = 1.701,<br>p = 0.228  | F(1,8) = 2.009,<br>p = 0.194  | 1.288                                             | 1.709                            | 0.746 ± 0.034 | 0.483 ± 0.207    | 0.709 ± 0.242 | 1.393 ± 0.587    |
|                | <i>5HT<sub>1A</sub></i> | F(3,8) = 1.789,<br>p = 0.227                                    | F(1,8) = 0.143,<br>p = 0.715  | F(1,8) = 1.520,<br>p = 0.253  | F(1,8) = 3.703,<br>p = 0.091  | 0.936                                             | 1.241                            | 1.010 ± 0.071 | 1.369 ± 0.158    | 1.742 ± 0.407 | 1.208 ± 0.138    |
|                | <i>5HT<sub>2A</sub></i> | F(3,8) = 0.815,<br>p = 0.521                                    | F(1,8) = 1.502,<br>p = 0.255  | F(1,8) = 0.944,<br>p = 0.360  | F(1,8) = 0.000,<br>p = 0.984  | 1.367                                             | 0.779                            | 0.168 ± 0.029 | 0.222 ± 0.014    | 0.126 ± 0.023 | 0.179 ± 0.079    |
|                | <i>5HT<sub>7</sub></i>  | F(3,8) = 0.028,<br>p = 0.993                                    | F(1,8) = 0.021,<br>p = 0.888  | F(1,8) = 0.043,<br>p = 0.841  | F(1,8) = 0.021,<br>p = 0.889  | 0.977                                             | 0.969                            | 0.953 ± 0.105 | 0.953 ± 0.111    | 0.944 ± 0.231 | 0.902 ± 0.096    |
|                | <i>GABAAα1</i>          | F(3,12) = 1.880,<br>p = 0.187                                   | F(1,12) = 3.673,<br>p = 0.079 | F(1,12) = 1.198,<br>p = 0.295 | F(1,12) = 0.770,<br>p = 0.398 | 0.784                                             | 0.874                            | 0.169 ± 0.029 | 0.149 ± 0.016    | 0.165 ± 0.014 | 0.113 ± 0.008    |
|                | <i>GABAAβ2</i>          | F(3,12) = 0.792,<br>p = 0.521                                   | F(1,12) = 0.749,<br>p = 0.404 | F(1,12) = 1.489,<br>p = 0.246 | F(1,12) = 0.138,<br>p = 0.717 | 0.830                                             | 1.297                            | 0.077 ± 0.017 | 0.068 ± 0.013    | 0.105 ± 0.026 | 0.083 ± 0.010    |
|                | <i>VGAT</i>             | F(3,12) = 2.826,<br>p = 0.084                                   | F(1,12) = 3.913,<br>p = 0.071 | F(1,12) = 1.120,<br>p = 0.311 | F(1,12) = 3.445,<br>p = 0.088 | 0.808                                             | 1.121                            | 0.597 ± 0.039 | 0.383 ± 0.026    | 0.553 ± 0.062 | 0.546 ± 0.080    |
| Raphe          | <i>SERT</i>             | F(3,10) = 1.175,<br>p = 0.911                                   | F(1,10) = 0.437,<br>p = 0.523 | F(1,10) = 0.062,<br>p = 0.808 | F(1,10) = 0.063,<br>p = 0.807 | 1.251                                             | 0.918                            | 0.438 ± 0.070 | 0.590 ± 0.109    | 0.438 ± 0.093 | 0.506 ± 0.183    |

**Supplementary Table S5. Real-time qRT-PCR primer sequences**

| Target genes                     | Primer sequence (5'-3')  |                              | Product size (bp) |
|----------------------------------|--------------------------|------------------------------|-------------------|
|                                  | Forward                  | Reverse                      |                   |
| <i>Crmp4</i>                     | GGTACAGAGCCTCAGCAAGG     | TTATCCCCATTTCCAGCATC         | 200               |
| <i>VGluT1</i>                    | TGGGTTTCTGTATCAGCTTTG    | TGTGCTGTTGTTGACCATGGACACG    | 74                |
| <i>VGluT2</i>                    | CGTGAAGAATGGCAGTATGTCTTC | TGAGGCAAATAGTGCATAAAATATGACT | 81                |
| <i>GluR1</i>                     | CCCTTTACAACGTGGAGGAA     | GAACAAGGGCGTCTCTTCTG         | 152               |
| <i>GluR2</i>                     | ACGAGTGGCACACTGAGGAA     | GCACCCAAGGAAAACCAGAG         | 103               |
| <i>GAD67</i>                     | CTCAGGCTGTATGTCAGATGTTC  | AAGCGAGTCACAGAGATTGGTC       | 111               |
| <i>VGAT</i>                      | CCATTGGCATCATCGTGTT      | CCAGTTCATCATGCAGTGGAA        | 101               |
| <i>GABAA<math>\alpha</math>1</i> | AAGGACCCATGACAGTGCTC     | CAGAGTGCCATCCTCTGTGA         | 149               |
| <i>GABAA<math>\beta</math>2</i>  | AACGCCTTCCATCATTGTTC     | ATCACCCTCCACGACATCA          | 148               |
| <i>GABAA<math>\gamma</math>2</i> | AGTGTGGGATGGCAAGGAC      | AGGAGTCCATTTTGGCAATG         | 111               |
| <i>GABABR1</i>                   | TCTGGTTGTGCTCTTTGTGC     | TCCTCATTGTTGTTGGTGGA         | 111               |
| <i>DAT</i>                       | CCAGCAATTCAGTGATGACATC   | CAGCATAGCCGCCAGTACAG         | 69                |
| <i>DIR</i>                       | CTCCTGATGGAACACCATTG     | GCTTAGCCCTCACGTTCTTG         | 119               |
| <i>D2R</i>                       | TGCCATTGTTCTTGGTGTTG     | AGAGGACTGGTGGGATGTTG         | 98                |
| <i>5HT<sub>1A</sub></i>          | CAAGACGGTCAAGAAGGTGG     | CACTACCTGGCTGACCATTC         | 101               |
| <i>5HT<sub>2A</sub></i>          | TTCGGGCTACAGGATGATTC     | TGATGGTTAGGGGGATGAAA         | 112               |
| <i>5HT<sub>7</sub></i>           | TGCGGTAAGCACACTACAGC     | CACAAAGCCTAGACGGGAAG         | 135               |
| <i>SERT</i>                      | TGCCTTTTATATCGCCTCCTAC   | CAGTTGCCAGTGTTC CAAGA        | 123               |
| <i>Ncam1</i>                     | TGTCAAGTGGCAGGAGATGC     | GGCGTTGTAGATGGTGAGGGT        | 138               |
| <i>N-cadherin</i>                | AGCGCAGTCTTACCGAAGG      | TCGCTGCTTTCATACTGAAC TTT     | 101               |
| <i><math>\beta</math>-actin</i>  | GCTACAGCTTACCACCACA      | TCTCCAGGGAGGAAGAGGAT         | 123               |
